# Supplementary material for: The identification of FANCD2 DNA binding domains reveals nuclear localization sequences
Source: PubMed Central journal article supplement — Nucleic Acids Res. 2017 Jun 28;45(14):8341–57. doi: 10.1093/nar/gkx543 (PMC5737651; doi:10.1093/nar/gkx543), 2017-06-28

**SUPPLEMENTARY TABLE 1A**  
**Oligonucleotides used for DNA binding substrates**

| Oligonucleotide name | DNA sequences (5' to 3')                                                                               |
|----------------------|--------------------------------------------------------------------------------------------------------|
| JYM925               | GGGTGAACCT GCAGGTGGGC AAAGATGTCC TAGCAATGTA ATCGTCAAGC TTTATGCCGT                                      |
| JYM926               | ACGCTGCCGA ATTCTACCAG TGCCAGCGAC GGACATCTTT GCCCACCTGC AGGTTCACCC                                      |
| JYM927               | ACGGCATAAA GCTTGACGATT ACATTGCTAC ATGGAGCTGT CTAGAGGATC CGACTATCG                                      |
| JYM928               | CGATAGTCGG ATCCTCTAGA CAGCTCCATGG TCGCTGGCAC TGGTAGAATT CGGCAGCGT                                      |
| JYM945               | ACGGCATAAA GCTTGACGAT TACATTGCTA GGACATCTTT GCCCACCTGC AGGTTCACCC                                      |
| JYM1395              | GCCAGGGACG GGGTGAACCT GCAGGTGGGC GGCTGCTCAT CGTAGGTTAG TATCGACCT<br>ATTGGTAGAAT TCGGCAGCGTC ATGCGACGGC |
| JYM1396              | GCCGTGCGAT GACGCTGCCG AATTCTACCA CGCTACTAGG GTGCCTTGCT AGGACATCTT<br>TGCCACCTG CAGGTTACCC CCGTCCCTGGC  |

**SUPPLEMENTARY TABLE 1B**  
**DNA binding substrates**

| Structures | Oligonucleotide used                  |
|------------|---------------------------------------|
| SS DNA     | JYM 925                               |
| DS DNA     | JYM 925, JYM 945                      |
| SA         | JYM 925, JYM 926                      |
| D-loop     | JYM 1745, JYM 1395 and JYM 1396       |
| HJ         | JYM 925, JYM 926, JYM 927 and JYM 928 |

**SUPPLEMENTARY TABLE 2**  
Summary of DNA binding screen

| <b>Peptide</b>         | <b>Number of Substituent Mutations</b> | <b>Residues Substituted</b>                                                        | <b>Effect on DNA binding</b> |
|------------------------|----------------------------------------|------------------------------------------------------------------------------------|------------------------------|
| F1-C (aa1 to 126)      | -                                      | -                                                                                  | ++                           |
| F1-E (aa 1 to 49)      | -                                      | -                                                                                  | ++                           |
| F1-F (aa 50 to 126)    | -                                      | -                                                                                  | +                            |
| F1-E peptide 2 mutated | 8 aa                                   | R24A ; K25A ; Q26A ; S29A ; K30A ; K31A ; T32A ; K34A                              | -                            |
| F1-C Mut Pep2 8aa      | 8 aa                                   | R24A ; K25A ; Q26A ; S29A ; K30A ; K31A ; T32A ; K34A                              | -                            |
| F1-C : Peptide 5       | 6 aa                                   | K77A; K78A ; Q81A ; T82A ; R84A ; R85A                                             | +                            |
| F1-C Mut Pep2+Pep5     | 14 aa                                  | R24A; K25A; Q26A; S29A; K30A; K31A; T32A; K34A K77A; K78A; Q81A; T82A; R84A ; R85A | -                            |
| F1 peptide 2 mutated   | 4 aa                                   | S29A; K30A; K31A; T32A                                                             | +                            |
| F3-A (aa 841 to 1004)  | -                                      | -                                                                                  | ++                           |
| F3-B (aa 1005 to 1178) | -                                      | -                                                                                  | +                            |
| F3: Pep2+Pep10 mutated | 11 aa                                  | K861A; R863A; K864A; K865A; K867A, K992A; N993A; K994A; S996A; R997A; N998A        | -                            |
| F3 : peptide 2         | 5 aa                                   | K861A; R863A; K864A; K865A; K867A                                                  | -                            |
| F3 : peptide 2         | 3 aa                                   | R863A; K864A; K865A                                                                | -                            |
| F3 : peptide 2         | 1 aa                                   | K865A                                                                              | -                            |
| F3 : peptide 10        | 6 aa                                   | K992A; N993A; K994A; S996A; R997A; N998A                                           | +                            |

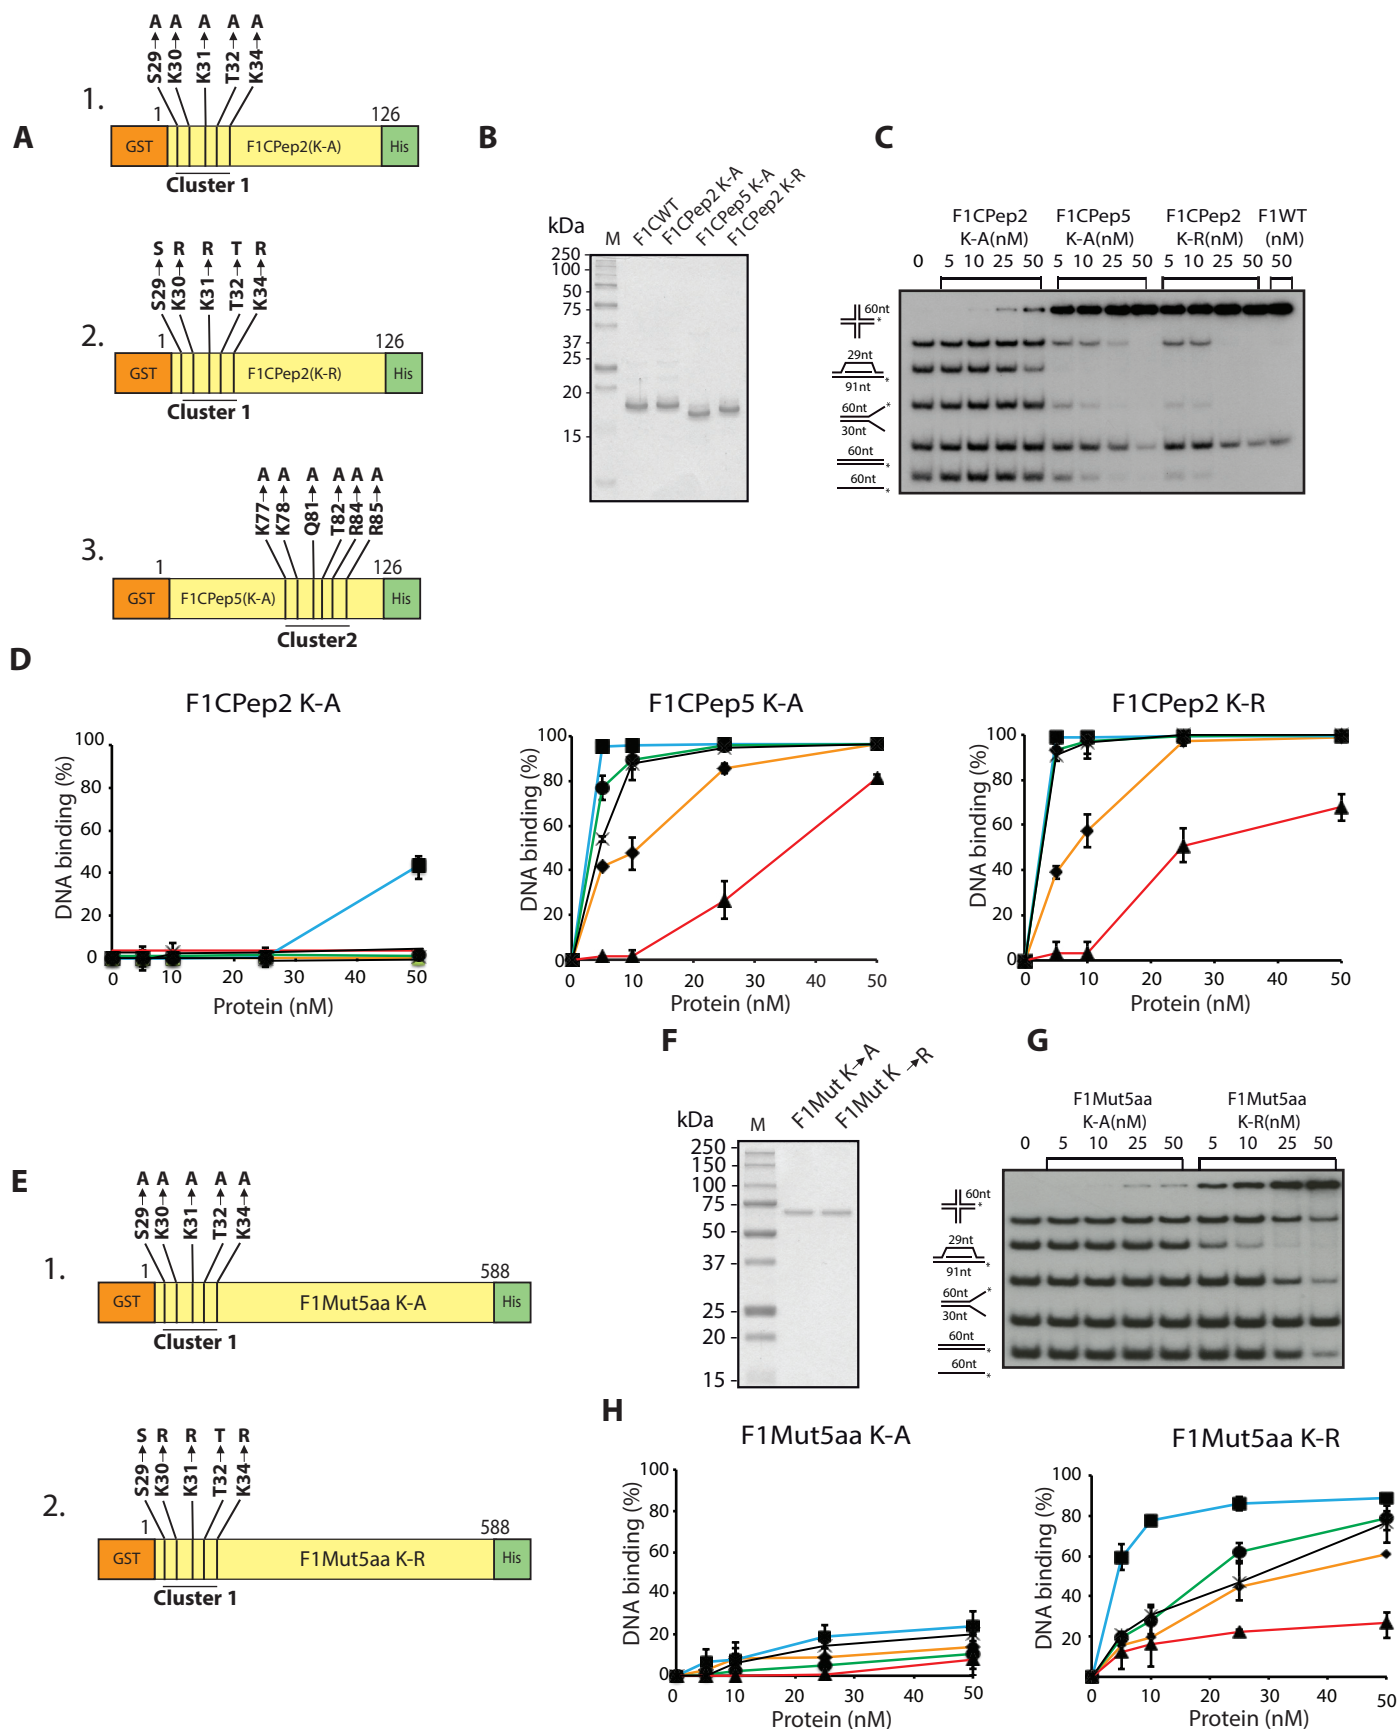

**Supplementary Figure 1. Charge dependant DNA binding of residues in Cluster1.** (A) Diagram representation indicating point mutations generated by site-specific mutagenesis. Cluster2 represents the mutations done in F1Cpep5 K-A. (B) Coomassie blue stained gel of purified F1CWT (18 kDa), F1Cpep2 K-A, F1Cpep5 K-A and F1Cpep2 K-R proteins. M, Molecular mass marker. (C) DNA binding activity of F1CWT, F1Cpep2 K-A, F1Cpep5 K-A and F1Cpep2 K-R to various recombinant DNA substrates. The percentage of DNA probes shifted were quantified by phosphorimaging and shown in (D). (E) Diagram representation of F1Mut5aa K-A (1) and F1Mut5aa K-R (2) mutants indicating point mutations generated by site-specific mutagenesis. Bold characters represent the substitutive mutations. (F) Purified F1Mut5aa K-A (66 kDa), F1Mut5aa K-R (66 kDa) proteins. M, Molecular mass marker. (G) DNA binding activity of F1Mut5aa K-A and F1Mut5aa K-R to various recombinant DNA substrates and DNA binding quantification (H) Error bars indicate S.E from three independently performed experiments.

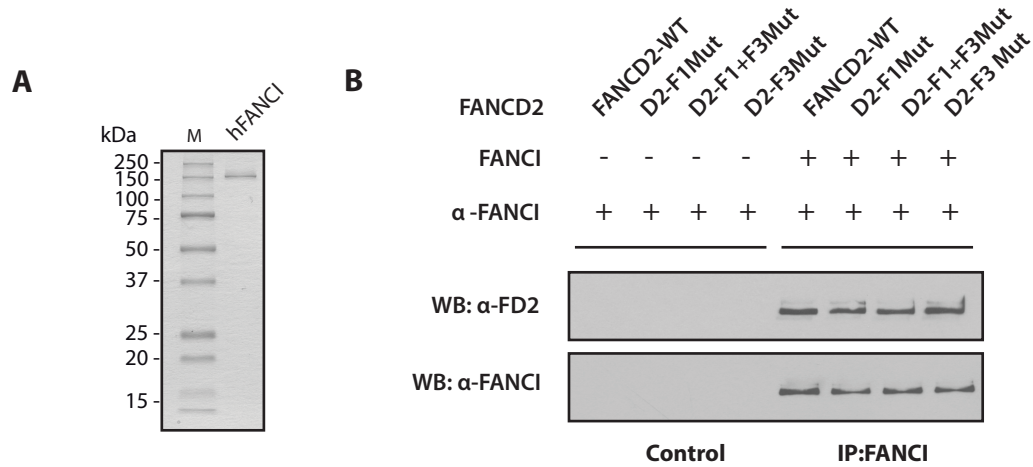

**Supplementary Figure 2: Interaction of FANCD2 WT and mutant proteins with FANCI.** (A) The Coomassie blue stained gel of purified His10-tagged FANCI protein. M, Molecular mass marker. (B) Purified Human FANCI and equimolar concentrations of purified full-length FANCD2WT, D2-F1Mut, D2-F3Mut, or D2-F1+F3Mut were subjected to immunoprecipitation analysis. Immunoprecipitations with anti-FANCI antibody was performed and immune complexes were immunoblotted with anti-FANCD2 and anti-Histidine antibody, as indicated.

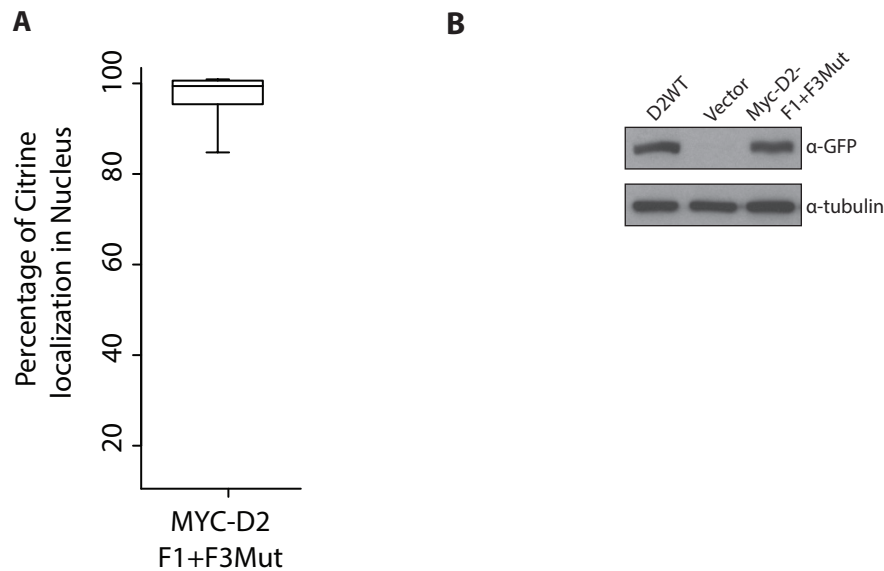

**Supplementary Figure 3: (A) Localisation of MYC-D2-F1+F3Mut.** A total of seventy-five FA-D2 cells expressing MYC-D2-F1+f3Mut were scored and box plotted for percentage of citrine expressed in the nucleus. (B) **Western blot showing comparable expression of D2WT and MYC-D2-F1+F3Mut in PD20 cells employed in Fig. 8E, F, and G.**

H. sapiens 1-MVSKRRLSKSEDK-ESLTEDASKTRKQPL---**SKKTKK**SHIANEVEEND  
 B. taurus 1-MVSKRRLSKSEDK-ESLTEDASKTRKQPL---**SKKTKK**SHIANEVEEND  
 P. troglodytes 1-MISKRKLSVSENK-ESLTEDASEARKQPL---**SKKTKK**SHVHNEVEEND  
 M. musculus 1-MISKRRRLDSEDK-ENLTEDASK--TMPL---**SKLAKK**SHNSHEVEENG  
 G. gallus 1-MVSKRKLSKIDAAEESKTDLQS--RCPETKR**SRISDK**RAPSQGGLENE  
 X. laevis 1-MVAKRKLSRSDDREESFTADTSTKNKKCRT---**SSKKS**KALPQDGVVEND

H. sapiens 835-DYVPPLGNFDVETLDITPHTVTAISAK-IRK**KGK**IERKQKTDGSKTS  
 B. taurus 835-DYVPPLGNFDVETLDITPHTVTAISAK-IRK**KGK**IERKQKTDGSKTS  
 P. troglodytes 835-DYVPPLANFDLETLEETPHTSTAVAKI-RMKGKTGGKKRKADGGKTS  
 M. musculus 832-DYVPPFASVDLDTLDMMPRSSSAVAANKNRNKGKTGGKKQKADSNKAS  
 G. gallus 837-GYVPPPATFDSEAPEGVPSINAGG----PVR**KK**-NGKKRKSDDSSKAC  
 X. laevis 834-GYIPSSAHFDSEPQEVLPSTAIAPA----PAK**KAK**KGKTPKSAGSKNA

**Supplementary Figure 4: DNA binding residues are evolutionary conserved.** A ClustalW multiple alignment of the DNA binding residues and the NLS of FANCD2 exhibits evolutionary semiconserved pattern, indicated by red and green colour bold letters.

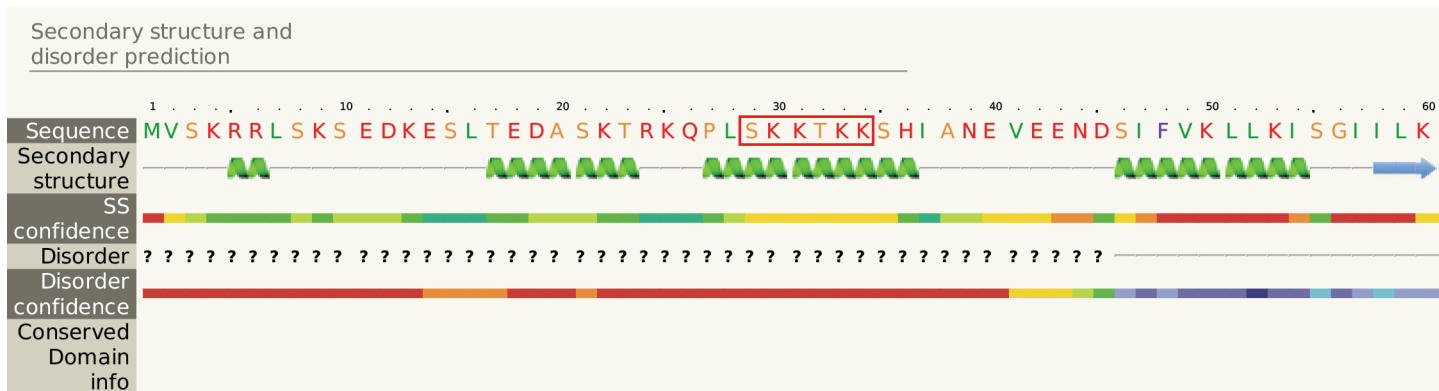

**Supplementary Figure 5: The N-terminal of FANCD2 has tendency to form helical structure.** A Phyre2 protein secondary structure prediction algorithm of the N-terminal residues in FANCD2 indicates its propensity to form the  $\alpha$ -helical secondary structure. DNA binding/NLS residues are depicted by the red box.

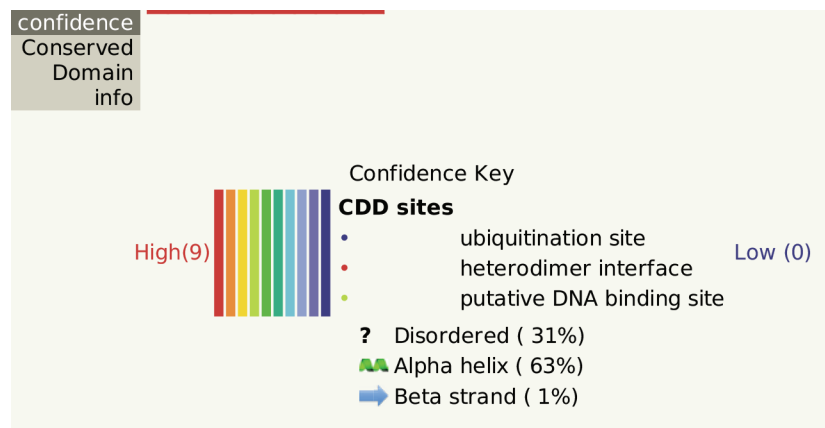

Supplement: gkx543_supp.pdf [file gkx543_supp.pdf]
